# Supplementary material for: Research on drought stress in Medicago sativa L. from 1998 to 2023: a bibliometric analysis
Source: PubMed Central journal article supplement (PMC11169798; doi:10.3389/fpls.2024.1406256), 2024-05-30
Supplement: DataSheet_1.pdf [file DataSheet_1.pdf]

**Table.S1** Top 20 most productive countries/regions on drought stress in *Medicago sativa* researches ranked by total number of publications. Note: a-Total Publications. b-Percentage (%).c-Total Citations. d-Avg. Citations. e-Links.f-Total Link Strength.

| Rank | Country     | Cluster | TP <sup>a</sup> | P <sup>b</sup> | TC <sup>c</sup> | CPP <sup>d</sup> | L <sup>e</sup> | TLS <sup>f</sup> |
|------|-------------|---------|-----------------|----------------|-----------------|------------------|----------------|------------------|
| 1    | China       | 6       | 385             | 35.62%         | 7229            | 18.78            | 26             | 99               |
| 2    | USA         | 9       | 213             | 19.70%         | 6240            | 29.30            | 39             | 104              |
| 3    | Australia   | 7       | 116             | 10.73%         | 2601            | 22.42            | 20             | 55               |
| 4    | Spain       | 1       | 76              | 7.03%          | 2596            | 34.16            | 23             | 60               |
| 5    | Canada      | 5       | 59              | 5.46%          | 1320            | 22.37            | 15             | 34               |
| 6    | Iran        | 10      | 51              | 4.72%          | 676             | 13.25            | 13             | 18               |
| 7    | France      | 1       | 40              | 3.70%          | 1366            | 34.15            | 18             | 46               |
| 8    | Italy       | 1       | 36              | 3.33%          | 928             | 25.78            | 13             | 25               |
| 9    | Germany     | 4       | 27              | 2.50%          | 688             | 25.48            | 19             | 24               |
| 10   | Morocco     | 1       | 27              | 2.50%          | 996             | 36.89            | 11             | 30               |
| 11   | South Korea | 6       | 23              | 2.13%          | 1297            | 56.39            | 7              | 20               |
| 12   | New Zealand | 3       | 21              | 1.94%          | 430             | 20.48            | 7              | 13               |
| 13   | Tunisia     | 1       | 21              | 1.94%          | 357             | 17.00            | 16             | 22               |
| 14   | Pakistan    | 8       | 16              | 1.48%          | 378             | 23.63            | 12             | 20               |
| 15   | India       | 8       | 15              | 1.39%          | 296             | 19.73            | 6              | 9                |
| 16   | Turkey      | 6       | 14              | 1.30%          | 284             | 20.29            | 10             | 13               |
| 17   | Greece      | 4       | 13              | 1.20%          | 201             | 15.46            | 2              | 2                |
| 18   | Hungary     | 4       | 12              | 1.11%          | 527             | 43.92            | 7              | 10               |
| 19   | Mexico      | 7       | 12              | 1.11%          | 201             | 16.75            | 5              | 13               |
| 20   | Poland      | 8       | 11              | 1.02%          | 156             | 14.18            | 1              | 1                |

**Table.S2** Top 20 institutions with the most publications on drought stress in *Medicago sativa*. Note: a-Total Publications. b-Percentage (%).e-Links. f-Total Link Strength

| Rank | Institution            | Country   | Cluster | TP <sup>a</sup> | P <sup>b</sup> | L <sup>e</sup> | TLS <sup>f</sup> |
|------|------------------------|-----------|---------|-----------------|----------------|----------------|------------------|
| 1    | chinese acad agr sci   | China     | 5       | 64              | 5.92%          | 85             | 2856.55          |
| 2    | chinese acad sci       | China     | 4       | 59              | 5.46%          | 87             | 2670.85          |
| 3    | lanzhou univ           | China     | 7       | 56              | 5.18%          | 87             | 1804.68          |
| 4    | china agr univ         | China     | 5       | 38              | 3.52%          | 83             | 1413.70          |
| 5    | agr & agri food canada | Canada    | 6       | 35              | 3.24%          | 86             | 1952.19          |
| 6    | northwest a&f univ     | China     | 4       | 35              | 3.24%          | 86             | 1349.24          |
| 7    | usda ars               | USA       | 1       | 33              | 3.05%          | 86             | 1249.84          |
| 8    | gansu agr univ         | China     | 7       | 28              | 2.59%          | 85             | 713.80           |
| 9    | univ chinese acad sci  | China     | 4       | 27              | 2.50%          | 85             | 1412.15          |
| 10   | univ navarra           | Spain     | 2       | 27              | 2.50%          | 85             | 1095.73          |
| 11   | univ western           | Australia | 3       | 25              | 2.31%          | 84             | 1150.34          |

|    |                              |             |   |    |       |    |        |
|----|------------------------------|-------------|---|----|-------|----|--------|
|    | australia                    |             |   |    |       |    |        |
| 12 | csic                         | Spain       | 2 | 21 | 1.94% | 86 | 847.82 |
| 13 | nanjing agr univ             | China       | 8 | 21 | 1.94% | 83 | 614.78 |
| 14 | inner mongolia agr univ      | China       | 4 | 20 | 1.85% | 81 | 672.87 |
| 15 | northeast agr univ           | China       | 4 | 19 | 1.76% | 78 | 396.87 |
| 16 | univ publ navarra            | Spain       | 2 | 17 | 1.57% | 87 | 805.32 |
| 17 | utah state univ              | USA         | 1 | 15 | 1.39% | 86 | 472.85 |
| 18 | samuel roberts noble fdn inc | New zealand | 1 | 14 | 1.30% | 85 | 501.81 |
| 19 | univ calif davis             | California  | 1 | 14 | 1.30% | 86 | 585.94 |
| 20 | univ barcelona               | Spain       | 2 | 13 | 1.20% | 85 | 658.22 |

**Table.S3** Top 20 most cited journals on drought stress in *Medicago sativa*. Note: a-Total Publications. b-Percentage (%). IF-Impact Factors. c-Co Citations. d-Avg. citations. e-Links.f-Total Link Strength.

| Rank | Journal title       | Country     | Cluster | IF    | CC <sup>c</sup> | L <sup>e</sup> | TLS <sup>f</sup> |
|------|---------------------|-------------|---------|-------|-----------------|----------------|------------------|
| 1    | plant physiol       | USA         | 2       | 7.4   | 2268            | 259            | 2014.17          |
| 2    | j exp bot           | England     | 4       | 6.9   | 1313            | 259            | 1239.22          |
| 3    | crop sci            | USA         | 3       | 6.9   | 1272            | 260            | 1090.68          |
| 4    | front plant sci     | Switzerland | 2       | 4.9   | 1009            | 258            | 946.09           |
| 5    | plant soil          | Netherlands | 1       | 5.6   | 950             | 260            | 884.97           |
| 6    | plant j             | England     | 2       | 2.1   | 855             | 255            | 811.63           |
| 7    | agron j             | USA         | 1       | 7.2   | 844             | 257            | 734.79           |
| 8    | plant cell environ  | England     | 4       | 7.3   | 780             | 260            | 741.81           |
| 9    | plant cell          | USA         | 2       | 12    | 745             | 237            | 702.19           |
| 10   | physiol plantarum   | Denmark     | 4       | 1.37  | 742             | 258            | 707.43           |
| 11   | aust j agr res      | Australia   | 3       | 6.4   | 726             | 253            | 572.41           |
| 12   | new phytol          | England     | 4       | 9.4   | 659             | 259            | 635.80           |
| 13   | j plant physiol     | Gernamy     | 4       | 4.3   | 632             | 255            | 606.24           |
| 14   | plant sci           | Ireland     | 2       | 5.2   | 612             | 256            | 594.54           |
| 15   | plant physiol bioch | Franch      | 2       | 6.5   | 599             | 255            | 578.61           |
| 16   | plos one            | USA         | 2       | 3.7   | 590             | 260            | 573.29           |
| 17   | aust j exp agr      | Australia   | 3       | 1.621 | 588             | 240            | 451.38           |
| 18   | agr water manage    | Netherlands | 1       | 6.7   | 574             | 244            | 484.60           |
| 19   | planta              | Gernamy     | 2       | 5.2   | 559             | 252            | 542.75           |
| 20   | p natl acad sci usa | USA         | 2       | 11.1  | 556             | 259            | 536.12           |
